# Supplementary material for: Costing Interventions for Developing an Essential Package of Health Services: Application of a Rapid Method and Results From Pakistan
Source: PubMed Central journal article supplement (PMC11607593; doi:10.34172/ijhpm.2023.8006), 2024-01-07
Supplement: ijhpm-13-8006-s002.pdf [file ijhpm-13-8006-s002.pdf]

**Article title:** Costing Interventions for Developing an Essential Package of Health Services: Application of a Rapid Method and Results from Pakistan

**Journal name:** International Journal of Health Policy and Management (IJHPM)

**Authors' information:** Wajeeha Raza<sup>1\*</sup>, Wahaj Zulfiqar<sup>2</sup>, Mashal Murad Shah<sup>3</sup>, Maryam Huda<sup>3</sup>, Syeda Shehirbano Akhtar<sup>2</sup>, Urooj Aqeel<sup>2</sup>, Saira Kanwal<sup>2</sup>, Muhammad Khalid<sup>2</sup>, Raza Zaidi<sup>2</sup>, Maarten Jansen<sup>4</sup>, Nichola Kitson<sup>5</sup>, Leon Bijlmakers<sup>4</sup>, Sameen Siddiqi<sup>3</sup>, Ala Alwan<sup>6</sup>, Anna Vassall<sup>5</sup>, Sergio Torres-Rueda<sup>5</sup>

<sup>1</sup>Centre for Health Economics, University of York, York, UK.

<sup>2</sup>Ministry of National Health Services, Regulations and Coordination, Islamabad, Pakistan.

<sup>3</sup>Department of Community Health Sciences, Aga Khan University, Karachi, Pakistan.

<sup>4</sup>Department of Health Evidence, Radboud Institute of Health Sciences, Radboud University Medical Centre, Nijmegen, The Netherlands.

<sup>5</sup>Department of Global Health & Development, London School of Hygiene and Tropical Medicine, London, UK.

<sup>6</sup>DCP3 Country Translation Project, London School of Hygiene and Tropical Medicine, London, UK.

**\*Correspondence to:** Wajeeha Raza; Email: [raza.wajeeha@gmail.com](mailto:raza.wajeeha@gmail.com)

**Citation:** Raza W, Zulfiqar W, Shah MM, et al. Costing interventions for developing an essential package of health services: application of a rapid method and results from Pakistan. Int J Health Policy Manag. 2024;13:8006. doi:[10.34172/ijhpm.2023.8006](https://doi.org/10.34172/ijhpm.2023.8006)

**Supplementary file 2.** List of DCP3 Interventions Considered in the Priority-Setting Process but Not Costed

*File 2 – List of DCP3 interventions considered in the priority-setting process but not costed*

FLH58 Specialty pathology services

RH19 Identify and refer patients with high risk

RH20 Prevention and relief of refractory suffering
